# Supplementary material
Source: PubMed Central journal article supplement (PMC6346596)
Supplement: 13280_2018_1062_MOESM1_ESM.pdf [file 13280_2018_1062_MOESM1_ESM.pdf]

***Ambio***

**Electronic Supplementary Material**

*This supplementary material has not been peer reviewed*

**Title:**

Mapping the social impacts of small dams: the case of Thailand's Ing River basin

**Authors:**

Zali Fung, Teerapong Pomun, Katrina J. Charles, Julian Kirchherr

## Appendix 1

### i) Villager Interviewee Codes

| #  | Interviewee              | Code |
|----|--------------------------|------|
| 1  | Village Head – Village A | HA1  |
| 2  | Villagers – Village A    | A1f  |
| 3  |                          | A2f  |
| 4  |                          | A3m  |
| 5  |                          | A4f  |
| 6  |                          | A5m  |
| 7  |                          | A6m  |
| 8  |                          | A7m  |
| 9  |                          | A8m  |
| 10 |                          | A9f  |
| 11 |                          | A10m |
| 12 |                          | A11f |
| 13 |                          | A12m |
| 14 |                          | A13f |
| 15 | Village Head – Village B | HB1  |
| 16 | Villagers – Village B    | B1m  |
| 17 |                          | B2m  |
| 18 |                          | B3m  |
| 19 |                          | B4f  |
| 20 |                          | B5f  |

|    |  |     |
|----|--|-----|
| 21 |  | B6m |
| 22 |  | B7f |
| 23 |  | B8f |
| 24 |  | B9f |

## ii) Key Informant Interviewee Codes

| #  | Interviewee                                                      | Organisation                                                                                                                                                                                    | Code |
|----|------------------------------------------------------------------|-------------------------------------------------------------------------------------------------------------------------------------------------------------------------------------------------|------|
| 25 | Director                                                         | Royal Irrigation Department (RID),<br>Phayao Province. Government of<br>Thailand                                                                                                                | G1m  |
| 26 | Director, Phayao Fisheries<br>Research and Development<br>Centre | Department of Fisheries, Phayao<br>Province. Government of Thailand                                                                                                                             | G2m  |
| 27 | Deputy Director                                                  | Living Rivers Siam                                                                                                                                                                              | N1m  |
| 28 | Director                                                         | Chiang Khong Conservation Group                                                                                                                                                                 | N2m  |
| 29 | Program and Outreach Director                                    | Mekong School for Local<br>Knowledge                                                                                                                                                            | N3m  |
| 30 | Director                                                         | Mekong Community Institute                                                                                                                                                                      | N4m  |
| 31 | Assistant                                                        | Shan Women's Action Network                                                                                                                                                                     | N5f  |
| 32 | Chairman                                                         | i. Foundation for the Integration of<br>Water Management<br><br>ii. Member, Committee of Sub-<br>Commissions on Community and<br>Resource Base, National Human<br>Rights Commission of Thailand | N6m  |
| 33 | Professor                                                        | Mahachulalongkorn Rajavidyalaya<br>University, Phayao Campus                                                                                                                                    | AC1f |
| 34 | Assistant Professor                                              | International Centre for Water                                                                                                                                                                  | AC2f |

|  |  |                                                              |  |
|--|--|--------------------------------------------------------------|--|
|  |  | Hazard and Risk Management,<br>University of Central Florida |  |
|--|--|--------------------------------------------------------------|--|
